# Supplementary material for: Characterisation of airway disease associated with Sjögren disease
Source: HighWire-hosted journal article supplement (doi:10.1136/rmdopen-2023-003866), 2024-02-01
Supplement: rmdopen-2023-003866supp001_data_supplement.pdf [file rmdopen-2023-003866supp001_data_supplement.pdf]

1 **ADDITIONAL FILE**

2

3 **SUPPLEMENTARY TABLES**

4

5 **Table S1: Comparison of the history of pulmonary involvement between Sjo-AD and**  
6 **controls**

|                        | <b>Sjo-AD,<br/>n=31 (%)</b> | <b>Sjo controls,<br/>n=62 (%)</b> | <b>P</b> |
|------------------------|-----------------------------|-----------------------------------|----------|
| Articular involvement  | 18 (58.1)                   | 34 (54.8)                         | 0.83     |
| Purpura                | 8 (25.8)                    | 7 (11.3)                          | 0.13     |
| Muscular               | 3 (9.7)                     | 3 (4.8)                           | 0.40     |
| Peripheral neuropathy  | 3 (9.7)                     | 12 (19.3)                         | 0.37     |
| Central nervous system | 1 (3.2)                     | 5 (8.1)                           | 0.66     |
| Renal impairment       | 3 (9.7)                     | 3 (4.8)                           | 0.40     |
| Splenomegaly           | 2 (6.4)                     | 2 (3.2)                           | 0.60     |
| Adenopathy             | 7 (22.6)                    | 6 (9.7)                           | 0.12     |

7 Mann-Whitney test was used.  $p < 0.05$  was considered significant.

8

9

10

11

12

13 **Table S2: Description of Sjo-AD biological domain of ESSDAI**

|                                    | <b>Sjo-AD, n=31 (%)</b> |
|------------------------------------|-------------------------|
| <u>Biological activity</u>         |                         |
| -Absent                            | 10 (32.3)               |
| -Low                               | 6 (19.3)                |
| -Moderate                          | 13 (41.9)               |
| <u>Items</u>                       |                         |
| -Hypocomplementemia                | 7/24 (29.2)             |
| -IgG level >16 and <20 g/L         | 3/25 (12)               |
| -IgG level >20 g/L                 | 8/25 (32)               |
| -Hypergammaglobulinemia > 13.5 g/L | 18/27 (66.7)            |
| -Hypogammaglobulinemia < 8g/L      | 2/27 (7.4)              |
| -Cryoglobulinemia                  | 6/26 (23.1)             |

14

15

16

17 **Table S3: Patients reported outcomes of Sjo-AD and controls**

|                     | <b>Sjo-AD,<br/>n=19 (%)</b> | <b>Sjo controls,<br/>n=57 (%)</b> | <b>p</b> |
|---------------------|-----------------------------|-----------------------------------|----------|
| VAS overall dryness | 59.3 ± 19.8 [15]            | 51 ± 25                           | 0.32     |
| VAS asthenia        | 62.7 ± 28.8                 | 63.2 ± 28.2 [56]                  | 0.92     |
| VAS pain            | 47.5 ± 30                   | 53.7 ± 26                         | 0.53     |

18 Data are presented as mean ± SD. The number of patients evaluated is indicated in square  
19 brackets when data were missing. Mann-Whitney and Fisher's exact test were used. p<0.05  
20 was considered significant.

21

22

23

24

25 **Table S4: Sjo-AD evolution based on the CT pattern**

|                              | <b>Diffuse Sjo-AD,<br/>n=15 (%)</b> | <b>Localized Sjo-<br/>AD, n=8 (%)</b> | <b>p</b>    |
|------------------------------|-------------------------------------|---------------------------------------|-------------|
| <b>Baseline PFT</b>          |                                     |                                       |             |
| -FEV1 (%pred)                | 72.8 ± 18.8 [13]                    | 93.9 ± 20.4                           | <b>0.02</b> |
| -FVC (%pred)                 | 89.2 ± 19.5 [13]                    | 106 ± 20.9                            | <b>0.03</b> |
| -FEV1/FVC                    | 68.4 ± 9.9 [12]                     | 74 ± 9.8                              | 0.31        |
| -TLC (%pred)                 | 99.6 ± 14.8 [14]                    | 94.3 ± 21.8                           | 0.63        |
| -DLCO (%pred)                | 68.1 ± 13.4 [12]                    | 72.5 ± 13.3 [7]                       | 0.43        |
| <b>Change in PFT (delta)</b> |                                     |                                       |             |
| -FEV1                        | -3.8 ± 15.5 [12]                    | -5.1 ± 10.2 [6]                       | 0.68        |
| -FVC                         | 1.2 ± 7 [12]                        | -10.4 ± 12.2 [6]                      | 0.05        |
| -FEV1/FVC                    | -1.8 ± 4.9 [11]                     | 2.6 ± 7.6 [6]                         | 0.35        |
| -TLC                         | -2.5 ± 11.8 [9]                     | 4 ± 10.2 [6]                          | 0.46        |
| -DLCO                        | -10 ± 17.2 [7]                      | 3.6 ± 9.4 [5]                         | 0.09        |
| <b>CT scan evolution</b>     |                                     |                                       |             |
| -Worsening                   | 4/14 (28.6)                         | 3/6 (50)                              | 0.6         |
| -Improvement/Stability       | 2/8/14 (71.4)                       | 2/1/6 (50)                            | 0.10        |

26 Diffuse Sjo-AD are defined as the association of both proximal (bronchiectasis) and distal  
27 (bronchiolitis) airway disease while localized Sjo-AD is defined as proximal or distal airways  
28 involvement. Delta represents the difference between last follow-up and baseline PFT. Mann-  
29 Whitney and Fisher's exact test were used. The number of patients evaluated is indicated in  
30 square brackets when data were missing. p<0.05 was considered significant.

31 **Table S5: Sjo-AD progression based on disease activity**

|                              | ESSDAI>5,<br>n=13 (%) | ESSDAI<5, n=<br>18 (%) | p           |
|------------------------------|-----------------------|------------------------|-------------|
| <b>Baseline PFT</b>          |                       |                        |             |
| -FEV1 (%pred)                | 71.5 ± 16.8<br>[12]   | 91.2 ± 22.4 [16]       | <b>0.02</b> |
| -FVC (%pred)                 | 87.9 ± 15.9<br>[12]   | 101 ± 23.6 [14]        | 0.08        |
| -FEV1/FVC                    | 68 ± 9.2 [11]         | 74.7 ± 10.5 [14]       | 0.12        |
| -TLC (%pred)                 | 95.2 ± 19.1<br>[12]   | 102.2 ± 21.2 [16]      | 0.73        |
| -DLCO (%pred)                | 72.1 ± 14 [11]        | 69.4 ± 12 [14]         | 0.88        |
| <b>Change in PFT (delta)</b> |                       |                        |             |
| -FEV1                        | -1.1 ± 12.2 [10]      | -3.8 ± 16.4 [10]       | 0.97        |
| -FVC                         | -0.6 ± 12.3 [11]      | 0 ± 13 [9]             | 0.71        |
| -FEV1/FVC                    | -0.7 ± 7.1 [10]       | -0.9 ± 5.3 [9]         | 0.84        |
| -TLC                         | 3.2 ± 13.7 [9]        | 0.2 ± 9.7 [8]          | 0.42        |
| -DLCO                        | -9.2 ± 21.9 [5]       | -0.9 ± 9.5 [7]         | 0.85        |
| <b>CT scan evolution</b>     |                       |                        |             |
| -Worsening                   | 5/10 (50)             | 4/12 (33.3)            | 0.66        |
| -Improvement/Stability       | 3/2/10 (50)           | 1/7/12 (66.7)          | 0.67        |

32 Delta represents difference between last follow-up and baseline PFT. Mann-Whitney and  
 33 Fisher's exact test were used. The number of patients evaluated is indicated in square brackets  
 34 when data were missing. p<0.05 was considered significant.

35

36

37

38

39

40

41

42

43

44

45

46

47 **Table S6: Comparison between extensive and non-extensive Sjo-AD**

|                              | Extensive Sjo-AD,<br>n=9 (%) | Non-extensive Sjo-AD,<br>n=13 (%) | p           |
|------------------------------|------------------------------|-----------------------------------|-------------|
| <b>Baseline PFT</b>          |                              |                                   |             |
| -FVC (%pred)                 | 98.7 ± 22.5                  | 93 ± 23.4 [11]                    | 0.50        |
| -FEV1 (%pred)                | 84.6 ± 16.6                  | 77.1 ± 26.5 [11]                  | 0.60        |
| -FEV1/FVC                    | 72.8 ± 8.3                   | 68.6 ± 11.5 [10]                  | 0.72        |
| -TLC (%pred)                 | 94.9 ± 22.1                  | 99.4 ± 17.1 [12]                  | 0.92        |
| -DLCO (%pred)                | 76.3 ± 13.8 [8]              | 64.2 ± 10 [12]                    | <b>0.02</b> |
| <b>Change in PFT (delta)</b> |                              |                                   |             |
| -FVC                         | -8.3 ± 7.5 [6]               | 0.8 ± 11 [11]                     | <b>0.01</b> |
| -FEV1                        | -7.2 ± 8.9 [6]               | -2.2 ± 16.3 [11]                  | 0.22        |
| -TLC                         | 2.6 ± 13.4 [6]               | -0.8 ± 10.7 [8]                   | 0.66        |
| -DLCO                        | -5.5 ± 11.7 [3]              | -3.9 ± 17.3 [9]                   | 0.68        |

48 Results are shown as n (%) unless otherwise indicated. Delta corresponds to the difference  
 49 between last follow-up PFT and baseline PFT. Wilcoxon test was used. The number of  
 50 patients evaluated is indicated in square brackets when data were missing. p<0.05 was  
 51 considered significant.

52

53

54

55

56

57 **Table S7: CT scan evolution based on ESSDAI and IgA status**

|                       | ESSDAI>5 IgA+,<br>n= 5 (%) | Negative score,<br>n= 11 (%) | p           |
|-----------------------|----------------------------|------------------------------|-------------|
| Worsening             | 5 (100)                    | 4 (36.4)                     | <b>0.03</b> |
| Improvement/Stability | 0/0                        | 3/5 (72.7)                   | <b>0.03</b> |

58 Fisher's exact test was used. p<0.05 was considered significant.

59

60

61

62

63

64

65

66

## 67 SUPPLEMENTARY FIGURES

68

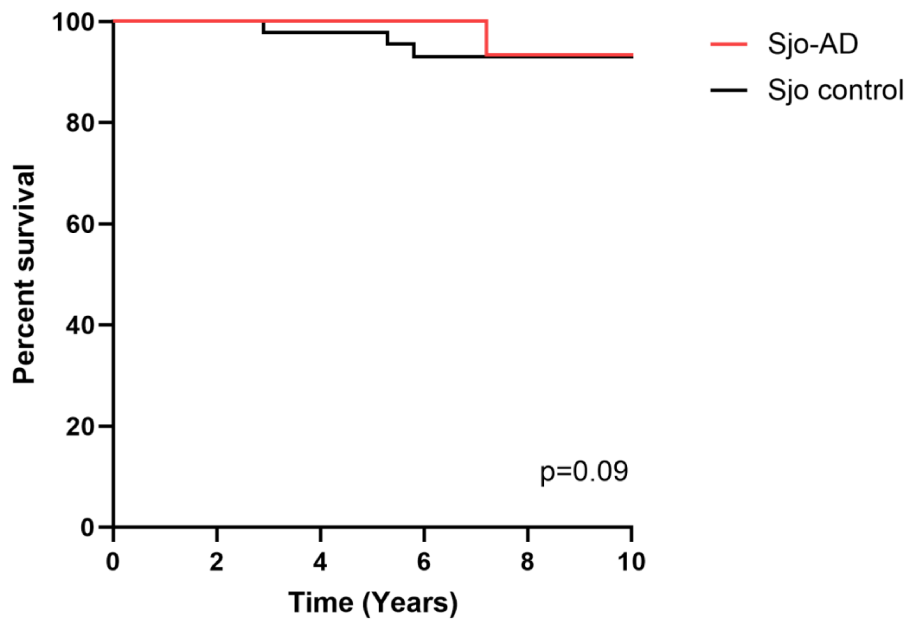**Number at risk**

|             |    |    |    |    |    |    |
|-------------|----|----|----|----|----|----|
| Sjo-AD      | 27 | 27 | 22 | 17 | 12 | 10 |
| Sjo control | 49 | 46 | 44 | 39 | 27 | 6  |

69

70 **Figure S1: Sjo-AD survival**

71 Kaplan Meier curves displaying the estimated survival probably was performed comparing  
 72 Sjo-AD to control. The log-rank test was performed and indicates the difference between  
 73 survival curves.  $p < 0.05$  was considered significant.

74

75

76

77

78

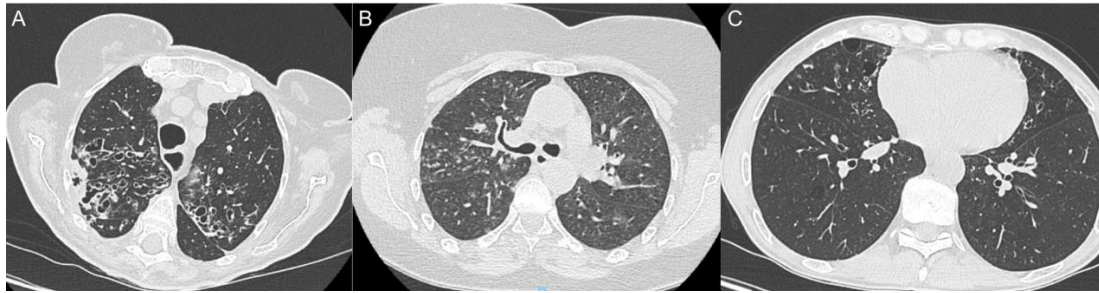

79

80 **Figure S2: Chest CT scans typical aspects of Sjo-AD and cysts**

81 Illustrations of chest CT scan typical aspects of Sjo-AD and cysts. (A) Bronchiectasis (B)

82 Bronchiolitis (C) Cysts.
